# Supplementary material
Source: Springer Nature journal article supplement (https://www.springermedizin.de/resource/supplementary/12936_2012_2487_MOESM4_ESM.pdf/9542680)

(A)

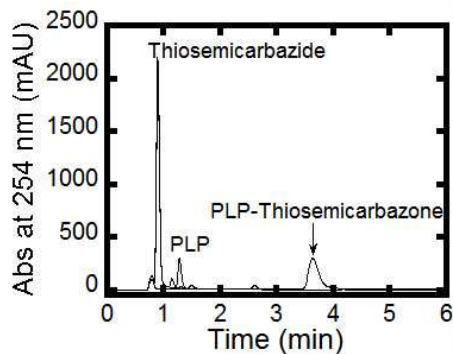

(B)

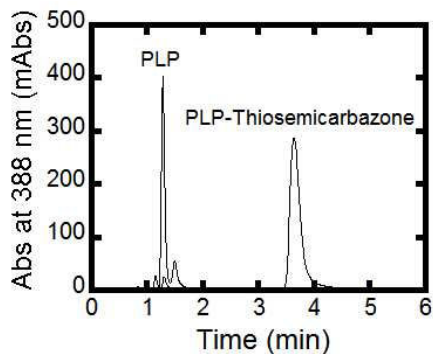

(C)

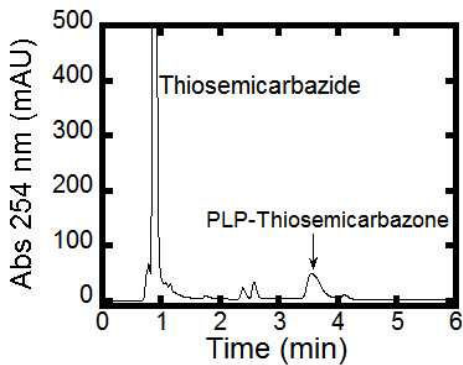

(D)

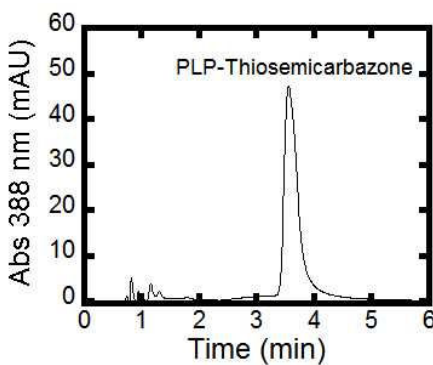

Supplement: MOESM4 [file 9542680]
